# Supplementary material for: Coaggregation of RNA-Binding Proteins in a Model of TDP-43 Proteinopathy with Selective RGG Motif Methylation and a Role for RRM1 Ubiquitination
Source: PLoS One. 2012 Jun 21;7(6):e38658. doi: 10.1371/journal.pone.0038658 (PMC3380899; doi:10.1371/journal.pone.0038658)
Supplement: Table S3 — Lysine methylation site peptides identified and quantified in the TDP-43 and TDP-S6 insoluble proteome of HEK-293 cells. Histone and elongation factor Tu methylation sites were identified without any quantified change due to TDP-43 or TDP-S6 overexpression. Note that H3 methylation sites are numbered on the mature histone without Met1. Ion suppression affected the four WT TDP-43 histone H3 XIC intensities in a single LC-MS/MS run relative to the comparable TDP-S6 and Mock runs. This suggests that extra caution must be taken when quantifying peptides without an internal standard. (XLS) [file pone.0038658.s007.xls]

## Sheet: S3.MethylLys_Peptides
	Table S3. Lysine Methylation Site Peptides identified and quantified in the TDP-43 and TDP-S6 insoluble proteome of HEK-293 cells.
	Protein	Sites		NCBI Accession	Outfile	Charge	Expected MH	ppm shift	Xcorr		Matched Ions	Novelty	Unlabeled XIC Intensity /100 (replicate 1)				SILAC Internal Std. XIC Intensity /100 (replicate 1)				Light/Heavy Peptide Ratio				Modified Peptide Percent of Control (unnormalized)			All Unmodified Peptides, Percent of Control			Modified Peptide Percent of Control (Normalized)
			Peptide							dCn			WT	S6	Mock		WT	S6	Mock		WT	S6	Mock		WT	S6		WT	S6		WT	S6
	EF-Tu / EEF1A1	K55-Me2	K.GSFKMe2YAWVLDK.L	NP_001393.1	/lab/user_data/edammer/2011_TDPCDIT_Methyl/diMe_s6_3EF/diMe_s6_3EF.1/diMe_s6_3EF.4973.4973.3.out	3	1341.72	5.03086	3.6419	0.3826	24/40		4340	4450	1360		3040	3230	1410		1.42763	1.37771	0.964539		1.48012	1.42836		1.44393	1.34723		1.02506	1.06022
	Histone H3.1	K27-Me2, K36-Me	R.KMe2SAPATGGVKMeKPHR.Y	NP_003523.1	/lab/user_data/edammer/2011_TDPCDIT_Methyl/monoMe_s6_3EF/monoMe_s6_3EF.1/monoMe_s6_3EF.1782.1782.3.out	3	1475.88	7.58192	2.4968	0.3775	18/52		419	8710	5220		394	10700	5880		1.06345	0.814019	0.887755		1.19791	0.916941		1.15669	0.846745		1.03564	1.0829
	Histone H3.1	K27-Me2, K36-Me2	R.KMe2SAPATGGVKMe2KPHR.Y	NP_003523.1	/lab/user_data/edammer/2011_TDPCDIT_Methyl/diMe_s6_6EF/diMe_s6_6EF.1/diMe_s6_6EF.2083.2083.3.out	3	1489.9	16.5179	3.2869	0.0455	23/52		697	20100	9140		884.499	31700	12200		0.788017	0.634298	0.750009		1.05068	0.84572		1.15669	0.846745		0.908349	0.998789
	Histone H3.1	K27-Me2	R.KMe2SAPATGGVK.K	NP_003523.1	/lab/user_data/edammer/2011_TDPCDIT_Methyl/diMe_wt_5EF/diMe_wt_5EF.1/diMe_wt_5EF.1463.1463.2.out	2	943.557	3.85774	2.8992	0.3807	16/18		505	8980	4810		579.991	12200	5370		0.870704	0.734857	0.895544		0.972262	0.82057		1.15669	0.846745		0.840557	0.969088
	Histone H3.3	K27-Me2, K36-Me	R.KMe2SAPSTGGVKMeKPHR.Y	NP_002098.1		3	1491.88	5.21491	2.2049	0.35	15/52		56	530	278		90	1390	444		0.622222	0.381295	0.626126		0.993765	0.608975		1.15669	0.846745		0.859147	0.719195
	Note: H3 methylation sites are numbered on the mature histone without Met1. Ion suppression affected the four WT TDP-43 histone H3 XIC intensities in a single LC-MS/MS run relative to the comparable TDP-S6 and Mock runs. This suggests that extra caution must be taken when quantifying peptides without an internal standard.
					diMe_wt_2EF.3048.3048.2.out
					diMe_s6_3EF.3098.3098.2.out
					diMe_wt_2EF.2093.2093.3.out
					diMe_s6_3EF.2144.2144.3.out
					diMe_wt_5EF.2293.2293.3.out
