# Supplementary material for: Coaggregation of RNA-Binding Proteins in a Model of TDP-43 Proteinopathy with Selective RGG Motif Methylation and a Role for RRM1 Ubiquitination
Source: PLoS One. 2012 Jun 21;7(6):e38658. doi: 10.1371/journal.pone.0038658 (PMC3380899; doi:10.1371/journal.pone.0038658)
Supplement: Table S4 — Identification of methylated and ubiquitinated proteins and peptides. All peptides identified by MS/MS to harbor PTMs in this study are listed with the mass error measured in Orbitrap (deltaMass), the SEQUEST matching scores (XCorr and deltaCn) and matched ion count. The labeled K or R residues are marked as follows: dimethyl-Lys (@), methyl-Lys ∧(), dimethyl-Arg (#), Lys-epsilon-amino-GG (ubiquitination, &). (XLS) [file pone.0038658.s008.xls]

## Sheet: S4.Modified_Peptides
Table S4. Methylated or Ubiquitinated Proteins/Peptides Identified in Experiment (All Unique Spectra)
Listed are the mass error measured in Orbitrap (deltaMass), the SEQUEST matching scores (XCorr and deltaCn) and matched ion count. Labels on K or R residues indicate the following: @: dimethyl-K ^: methyl-K #: dimethyl-R &: KGG (ubiquitination)
#	Peptide	Accession	Outfile	Charge	Exp. MS1 mz	deltaMass (ppm)	XCorr	dCn	Sequest Ions	Protein
1	K.GSFK@YAWVLDK.L	gi|239757543|ref|XP_002345477.1|	/lab/user_data/edammer/2011_TDPCDIT_Methyl/diMe_wt_5EF/diMe_wt_5EF.1/diMe_wt_5EF.5323.5323.3.out	3	1341.72	4.82962	3.4546	0.4698	24/40	EF-Tu
2	K.GSFK@YAWVLDK.L	gi|239757543|ref|XP_002345477.1|	/lab/user_data/edammer/2011_TDPCDIT_Methyl/diMe_wt_5EF/diMe_wt_5EF.1/diMe_wt_5EF.5305.5305.2.out	2	1341.72	6.52148	2.7061	0.4047	14/20	EF-Tu
3	K.GSFK@YAWVLDK.L	gi|239757543|ref|XP_002345477.1|	/lab/user_data/edammer/2011_TDPCDIT_Methyl/diMe_wt_5CD/diMe_wt_5CD.1/diMe_wt_5CD.5167.5167.2.out	2	1341.72	7.98229	2.7137	0.4027	12/20	EF-Tu
4	K.GSFK@YAWVLDK.L	gi|239757543|ref|XP_002345477.1|	/lab/user_data/edammer/2011_TDPCDIT_Methyl/diMe_wt_2EF/diMe_wt_2EF.1/diMe_wt_2EF.4909.4909.3.out	3	1341.72	6.05939	3.3419	0.4977	24/40	EF-Tu
5	K.GSFK@YAWVLDK.L	gi|239757543|ref|XP_002345477.1|	/lab/user_data/edammer/2011_TDPCDIT_Methyl/diMe_wt_2EF/diMe_wt_2EF.1/diMe_wt_2EF.4902.4902.2.out	2	1341.72	8.16117	2.8511	0.4122	14/20	EF-Tu
6	K.GSFK@YAWVLDK.L	gi|239757543|ref|XP_002345477.1|	/lab/user_data/edammer/2011_TDPCDIT_Methyl/diMe_wt_2CD/diMe_wt_2CD.1/diMe_wt_2CD.4926.4926.2.out	2	1341.72	5.34389	2.6216	0.3454	13/20	EF-Tu
7	K.GSFK@YAWVLDK.L	gi|239757543|ref|XP_002345477.1|	/lab/user_data/edammer/2011_TDPCDIT_Methyl/diMe_s6_6AB/diMe_s6_6AB.1/diMe_s6_6AB.4495.4495.2.out	2	1341.72	1.7962	2.2242	0.3923	12/20	EF-Tu
8	K.GSFK@YAWVLDK.L	gi|239757543|ref|XP_002345477.1|	/lab/user_data/edammer/2011_TDPCDIT_Methyl/diMe_s6_3EF/diMe_s6_3EF.1/diMe_s6_3EF.4973.4973.3.out	3	1341.72	5.03086	3.6419	0.3826	24/40	EF-Tu
9	K.GSFK@YAWVLDK.L	gi|239757543|ref|XP_002345477.1|	/lab/user_data/edammer/2011_TDPCDIT_Methyl/diMe_s6_3EF/diMe_s6_3EF.1/diMe_s6_3EF.4959.4959.2.out	2	1341.72	6.70781	2.776	0.4267	13/20	EF-Tu
10	K.GSFK@YAWVLDK.L	gi|239757543|ref|XP_002345477.1|	/lab/user_data/edammer/2011_TDPCDIT_Methyl/diMe_ctl_4EF/diMe_ctl_4EF.1/diMe_ctl_4EF.5843.5843.2.out	2	1341.72	5.25445	2.5819	0.4244	13/20	EF-Tu
11	K.GSFK@YAWVLDK.L	gi|239757543|ref|XP_002345477.1|	/lab/user_data/edammer/2011_TDPCDIT_Methyl/diMe_ctl_4EF/diMe_ctl_4EF.1/diMe_ctl_4EF.5783.5783.2.out	2	1341.72	4.52404	2.5097	0.3937	12/20	EF-Tu
12	K.GSFK@YAWVLDK.L	gi|239757543|ref|XP_002345477.1|	/lab/user_data/edammer/2011_TDPCDIT_Methyl/diMe_ctl_4CD/diMe_ctl_4CD.1/diMe_ctl_4CD.4874.4874.2.out	2	1341.72	5.25445	2.8248	0.3614	14/20	EF-Tu
13	K.GSFK@YAWVLDK.L	gi|239757543|ref|XP_002345477.1|	/lab/user_data/edammer/2011_TDPCDIT_Methyl/diMe_ctl_1CD/diMe_ctl_1CD.1/diMe_ctl_1CD.4628.4628.2.out	2	1341.72	5.6122	2.8249	0.4231	14/20	EF-Tu
14	R.GGR#GR#GGSGGGGGGGGGGYNR.S	gi|4826734|ref|NP_004951.1|	/lab/user_data/edammer/2011_TDPCDIT_Methyl/diMe_wt_5CD/diMe_wt_5CD.1/diMe_wt_5CD.1567.1567.3.out	3	1762.84	5.06568	2.8055	0.3638	26/80	FUS
15	R.GGR#GR#GGSGGGGGGGGGGYNR.S	gi|283135173|ref|NP_001164408.1|	/lab/user_data/edammer/2011_TDPCDIT_Methyl/diMe_s6_3CD/diMe_s6_3CD.1/diMe_s6_3CD.1406.1406.3.out	3	1762.84	5.37767	3.0992	0.3784	31/80	FUS
16	R.GGR#GR#GGSGGGGGGGGGGYNR.S	gi|4826734|ref|NP_004951.1|	/lab/user_data/edammer/2011_TDPCDIT_Methyl/diMe_ctl_1CD/diMe_ctl_1CD.1/diMe_ctl_1CD.1369.1369.3.out	3	1762.84	4.85579	3.5466	0.5075	32/80	FUS
17	R.K@SAPATGGVK.K	gi|4504287|ref|NP_003523.1|	/lab/user_data/edammer/2011_TDPCDIT_Methyl/diMe_wt_5EF/diMe_wt_5EF.1/diMe_wt_5EF.1463.1463.2.out	2	943.557	3.85774	2.8992	0.3807	16/18	Histone H3.1
18	R.K@SAPATGGVK@KPHR.Y	gi|4504287|ref|NP_003523.1|	/lab/user_data/edammer/2011_TDPCDIT_Methyl/diMe_s6_6EF/diMe_s6_6EF.1/diMe_s6_6EF.2083.2083.3.out	3	1489.9	16.5179	3.2869	0.0455	23/52	Histone H3.1
19	R.K@SAPATGGVK.K	gi|4504287|ref|NP_003523.1|	/lab/user_data/edammer/2011_TDPCDIT_Methyl/diMe_s6_6EF/diMe_s6_6EF.1/diMe_s6_6EF.1501.1501.2.out	2	943.557	11.2341	2.7076	0.4568	15/18	Histone H3.1
20	R.K@SAPATGGVK.K	gi|4504287|ref|NP_003523.1|	/lab/user_data/edammer/2011_TDPCDIT_Methyl/diMe_s6_3EF/diMe_s6_3EF.1/diMe_s6_3EF.1309.1309.2.out	2	943.557	7.0266	2.5079	0.3165	15/18	Histone H3.1
21	R.K@SAPATGGVK.K	gi|4504287|ref|NP_003523.1|	/lab/user_data/edammer/2011_TDPCDIT_Methyl/diMe_ctl_1EF/diMe_ctl_1EF.1/diMe_ctl_1EF.1223.1223.2.out	2	943.557	6.06217	2.6206	0.385	14/18	Histone H3.1
22	R.K@SAPATGGVK^KPHR.Y	gi|4504287|ref|NP_003523.1|	/lab/user_data/edammer/2011_TDPCDIT_Methyl/monoMe_ctl_1EF/monoMe_ctl_1EF.1/monoMe_ctl_1EF.1712.1712.3.out	3	1475.88	6.5859	3.0391	0.3979	19/52	Histone H3.1
23	R.K@SAPSTGGVK^KPHR.Y	gi|4504279|ref|NP_002098.1|	/lab/user_data/edammer/2011_TDPCDIT_Methyl/monoMe_s6_3EF/monoMe_s6_3EF.1/monoMe_s6_3EF.1774.1774.3.out	3	1491.88	5.21491	2.2049	0.3461	15/52	Histone H3.3
24	R.K@SAPATGGVK^KPHR.Y	gi|4504287|ref|NP_003523.1|	/lab/user_data/edammer/2011_TDPCDIT_Methyl/monoMe_s6_3EF/monoMe_s6_3EF.1/monoMe_s6_3EF.1782.1782.3.out	3	1475.88	7.58192	2.4968	0.3775	18/52	Histone H3.1
25	R.K@SAPATGGVK^KPHR.Y	gi|4504287|ref|NP_003523.1|	/lab/user_data/edammer/2011_TDPCDIT_Methyl/monoMe_s6_3EF/monoMe_s6_3EF.1/monoMe_s6_3EF.1790.1790.2.out	2	1475.88	6.6401	2.2001	0.3051	12/26	Histone H3.1
26	R.SNSGPYR#GGYGGGGGYGGSSF.-	gi|5803036|ref|NP_006796.1|	/lab/user_data/edammer/2011_TDPCDIT_Methyl/diMe_wt_2EF/diMe_wt_2EF.1/diMe_wt_2EF.3048.3048.2.out	2	1968.85	5.07404	3.6912	0.7906	23/40	hnRNP A0
27	R.SNSGPYR#GGYGGGGGYGGSSF.-	gi|5803036|ref|NP_006796.1|	/lab/user_data/edammer/2011_TDPCDIT_Methyl/diMe_s6_6EF/diMe_s6_6EF.1/diMe_s6_6EF.3374.3374.2.out	2	1968.85	3.83473	4.315	0.761	22/40	hnRNP A0
28	R.SNSGPYR#GGYGGGGGYGGSSF.-	gi|5803036|ref|NP_006796.1|	/lab/user_data/edammer/2011_TDPCDIT_Methyl/diMe_s6_3EF/diMe_s6_3EF.1/diMe_s6_3EF.3098.3098.2.out	2	1968.85	2.9662	3.4723	0.6376	21/40	hnRNP A0
29	R.R#GGHQNSYKPY.-	gi|14110420|ref|NP_112738.1|	/lab/user_data/edammer/2011_TDPCDIT_Methyl/diMe_wt_5EF/diMe_wt_5EF.1/diMe_wt_5EF.2294.2294.3.out	3	1334.66	9.20085	2.4298	0.4235	19/40	hnRNP D0
30	R.R#GGHQNSYKPY.-	gi|14110420|ref|NP_112738.1|	/lab/user_data/edammer/2011_TDPCDIT_Methyl/diMe_wt_2EF/diMe_wt_2EF.1/diMe_wt_2EF.2089.2089.3.out	3	1334.66	6.24878	2.9316	0.4946	23/40	hnRNP D0
31	R.R#GGHQNSYKPY.-	gi|14110420|ref|NP_112738.1|	/lab/user_data/edammer/2011_TDPCDIT_Methyl/diMe_ctl_4EF/diMe_ctl_4EF.1/diMe_ctl_4EF.2226.2226.3.out	3	1334.66	5.70183	2.5288	0.4194	17/40	hnRNP D0
32	R.R#GGHQNSYKPY.-	gi|14110420|ref|NP_112738.1|	/lab/user_data/edammer/2011_TDPCDIT_Methyl/diMe_ctl_1EF/diMe_ctl_1EF.1/diMe_ctl_1EF.2066.2066.3.out	3	1334.66	5.97905	2.335	0.4064	17/40	hnRNP D0
33	R.R#GGHQNNYKPY.-	gi|55956921|ref|NP_004490.2|	/lab/user_data/edammer/2011_TDPCDIT_Methyl/diMe_ctl_1EF/diMe_ctl_1EF.1/diMe_ctl_1EF.2028.2028.3.out	3	1361.67	5.9192	3.0205	0.3848	19/40	hnRNP AB
34	R.R#GNMPQR#GGGGGGSGGIGYPYPR.A	gi|74136883|ref|NP_114032.2|	/lab/user_data/edammer/2011_TDPCDIT_Methyl/diMe_wt_5CD/diMe_wt_5CD.1/diMe_wt_5CD.3150.3150.3.out	3	2304.14	5.49011	3.5098	0.5131	35/88	hnRNP U
35	R.R#GNMPQR#GGGGGGSGGIGYPYPR.A	gi|74136883|ref|NP_114032.2|	/lab/user_data/edammer/2011_TDPCDIT_Methyl/diMe_wt_2CD/diMe_wt_2CD.1/diMe_wt_2CD.3035.3035.3.out	3	2304.14	3.97979	3.0765	0.3869	27/88	hnRNP U
36	R.R#GNM*PQR#GGGGGGSGGIGYPYPR.A	gi|74136883|ref|NP_114032.2|	/lab/user_data/edammer/2011_TDPCDIT_Methyl/diMe_wt_2CD/diMe_wt_2CD.1/diMe_wt_2CD.2870.2870.4.out	4	2320.14	6.26687	3.3533	0.4851	41/132	hnRNP U
37	R.R#GNMPQR#GGGGGGSGGIGYPYPR.A	gi|74136883|ref|NP_114032.2|	/lab/user_data/edammer/2011_TDPCDIT_Methyl/diMe_s6_6AB/diMe_s6_6AB.1/diMe_s6_6AB.2761.2761.3.out	3	2304.14	3.42427	2.8915	0.303	25/88	hnRNP U
38	R.R#GNMPQR#GGGGGGSGGIGYPYPR.A	gi|74136883|ref|NP_114032.2|	/lab/user_data/edammer/2011_TDPCDIT_Methyl/diMe_s6_6AB/diMe_s6_6AB.1/diMe_s6_6AB.2760.2760.4.out	4	2304.14	3.78883	2.5356	0.0163	37/132	hnRNP U
39	R.R#GNM*PQR#GGGGGGSGGIGYPYPR.A	gi|74136883|ref|NP_114032.2|	/lab/user_data/edammer/2011_TDPCDIT_Methyl/diMe_s6_6AB/diMe_s6_6AB.1/diMe_s6_6AB.2613.2613.4.out	4	2320.14	6.37032	2.5785	0.2649	36/132	hnRNP U
40	R.R#GNMPQR#GGGGGGSGGIGYPYPR.A	gi|74136883|ref|NP_114032.2|	/lab/user_data/edammer/2011_TDPCDIT_Methyl/diMe_s6_3CD/diMe_s6_3CD.1/diMe_s6_3CD.2911.2911.3.out	3	2304.14	1.75336	3.0142	0.4769	29/88	hnRNP U
41	R.R#GNM*PQR#GGGGGGSGGIGYPYPR.A	gi|74136883|ref|NP_114032.2|	/lab/user_data/edammer/2011_TDPCDIT_Methyl/diMe_s6_3CD/diMe_s6_3CD.1/diMe_s6_3CD.2750.2750.4.out	4	2320.14	7.42198	3.175	0.4449	38/132	hnRNP U
42	R.R#GNMPQR#GGGGGGSGGIGYPYPR.A	gi|74136883|ref|NP_114032.2|	/lab/user_data/edammer/2011_TDPCDIT_Methyl/diMe_ctl_4CD/diMe_ctl_4CD.1/diMe_ctl_4CD.3034.3034.4.out	4	2304.14	6.43624	2.3904	0.4002	31/132	hnRNP U
43	R.R#GNM*PQR#GGGGGGSGGIGYPYPR.A	gi|74136883|ref|NP_114032.2|	/lab/user_data/edammer/2011_TDPCDIT_Methyl/diMe_ctl_4CD/diMe_ctl_4CD.1/diMe_ctl_4CD.2865.2865.4.out	4	2320.14	6.68495	3.2139	0.4174	38/132	hnRNP U
44	R.NR#GAGGFGGGGGTR.R	gi|238776833|ref|NP_005773.3|	/lab/user_data/edammer/2011_TDPCDIT_Methyl/diMe_wt_5EF/diMe_wt_5EF.1/diMe_wt_5EF.1923.1923.3.out	3	1248.62	6.40708	3.2132	0.4965	25/52	THO Complex 4
45	R.NR#GAGGFGGGGGTR.R	gi|238776833|ref|NP_005773.3|	/lab/user_data/edammer/2011_TDPCDIT_Methyl/diMe_s6_6EF/diMe_s6_6EF.1/diMe_s6_6EF.2025.2025.3.out	3	1248.62	6.70341	3.0379	0.3647	19/52	THO Complex 4
46	R.NR#GAGGFGGGGGTR.R	gi|238776833|ref|NP_005773.3|	/lab/user_data/edammer/2011_TDPCDIT_Methyl/diMe_s6_3EF/diMe_s6_3EF.1/diMe_s6_3EF.1786.1786.3.out	3	1248.62	5.45403	2.6408	0.2734	21/52	THO Complex 4
47	R.NR#GAGGFGGGGGTR.R	gi|238776833|ref|NP_005773.3|	/lab/user_data/edammer/2011_TDPCDIT_Methyl/diMe_ctl_4EF/diMe_ctl_4EF.1/diMe_ctl_4EF.1838.1838.3.out	3	1248.62	3.03535	2.6331	0.4419	20/52	THO Complex 4
48	R.NR#GAGGFGGGGGTR.R	gi|238776833|ref|NP_005773.3|	/lab/user_data/edammer/2011_TDPCDIT_Methyl/diMe_ctl_1EF/diMe_ctl_1EF.1/diMe_ctl_1EF.1707.1707.3.out	3	1248.62	9.05	2.3494	0.2504	22/52	THO Complex 4
49	R.SYR#GGGGGGGGWR.A	gi|4759098|ref|NP_004584.1|	/lab/user_data/edammer/2011_TDPCDIT_Methyl/diMe_wt_5EF/diMe_wt_5EF.1/diMe_wt_5EF.2293.2293.3.out	3	1251.6	8.90861	3.4345	0.5532	22/48	Transformer 2
50	R.SYR#GGGGGGGGWR.A	gi|4759098|ref|NP_004584.1|	/lab/user_data/edammer/2011_TDPCDIT_Methyl/diMe_wt_2EF/diMe_wt_2EF.1/diMe_wt_2EF.2093.2093.3.out	3	1251.6	4.3784	3.8316	0.4893	23/48	Transformer 2
51	R.SYR#GGGGGGGGWR.A	gi|4759098|ref|NP_004584.1|	/lab/user_data/edammer/2011_TDPCDIT_Methyl/diMe_s6_3EF/diMe_s6_3EF.1/diMe_s6_3EF.2144.2144.3.out	3	1251.6	6.79132	3.4674	0.4444	23/48	Transformer 2
52	R.SYR#GGGGGGGGWR.A	gi|4759098|ref|NP_004584.1|	/lab/user_data/edammer/2011_TDPCDIT_Methyl/diMe_ctl_1EF/diMe_ctl_1EF.1/diMe_ctl_1EF.2069.2069.3.out	3	1251.6	7.07895	3.6658	0.5272	25/48	Transformer 2
53	K.TSDLIVLGLPWK&TTEQDLK.E	gi|6678271|ref|NP_031401.1|	/lab/user_data/edammer/2011_TDPCDIT_GGsites/s6_6EF/s6_6EF.1/s6_6EF.6435.6435.3.out	3	2271.23	3.22293	3.7646	0.1162	26/72	TDP-43 or TDP-S6
54	R.AVQK&TSDLIVLGLPWK.T	gi|6678271|ref|NP_031401.1|	/lab/user_data/edammer/2011_TDPCDIT_GGsites/s6_3CD/s6_3CD.1/s6_3CD.5834.5834.3.out	3	1882.09	4.56941	3.6805	0.4872	23/60	TDP-43 or TDP-S6
55	K.LPNSK&QSQDEPLR.S	gi|6678271|ref|NP_031401.1|	/lab/user_data/edammer/2011_TDPCDIT_GGsites/s6_6CD/s6_6CD.1/s6_6CD.2051.2051.3.out	3	1625.83	6.13227	3.4095	0.5604	25/48	TDP-43 or TDP-S6
56	R.AVQK&TSDLIVLGLPWK.T	gi|6678271|ref|NP_031401.1|	/lab/user_data/edammer/2011_TDPCDIT_GGsites/s6_3EF/s6_3EF.1/s6_3EF.5999.5999.3.out	3	1882.09	3.88931	3.3375	0.3336	26/60	TDP-43 or TDP-S6
57	K.LPNSK&QSQDEPLR.S	gi|6678271|ref|NP_031401.1|	/lab/user_data/edammer/2011_TDPCDIT_GGsites/s6_3CD/s6_3CD.1/s6_3CD.1904.1904.3.out	3	1625.83	2.19581	2.7042	0.4502	18/48	TDP-43 or TDP-S6
58	K.TSDLIVLGLPWK&TTEQDLK.E	gi|6678271|ref|NP_031401.1|	/lab/user_data/edammer/2011_TDPCDIT_GGsites/s6_3CD/s6_3CD.1/s6_3CD.5892.5892.3.out	3	2271.23	4.30605	3.4014	0.6311	24/72	TDP-43 or TDP-S6
59	K.TSDLIVLGLPWK&TTEQDLK.E	gi|6678271|ref|NP_031401.1|	/lab/user_data/edammer/2011_TDPCDIT_GGsites/s6_3EF/s6_3EF.1/s6_3EF.6080.6080.3.out	3	2271.23	5.11178	4.6219	0.656	27/72	TDP-43 or TDP-S6
